# Supplementary material for: The global distribution of known and undiscovered ant biodiversity
Source: PubMed Central journal article supplement (PMC9348798; doi:10.1126/sciadv.abp9908), 2022-08-03
Supplement: sciadv.abp9908_sm.v2.pdf [file sciadv.abp9908_sm.v2.pdf]

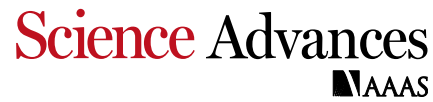

## Supplementary Materials for

### **The global distribution of known and undiscovered ant biodiversity**

Jamie M. Kass *et al.*

Corresponding author: Evan P. Economo, [evaneconomo@gmail.com](mailto:evaneconomo@gmail.com); Jamie M. Kass, [jamie.m.kass@gmail.com](mailto:jamie.m.kass@gmail.com)

*Sci. Adv.* **8**, eabp9908 (2022)  
DOI: 10.1126/sciadv.abp9908

#### **The PDF file includes:**

Figs. S1 to S7  
Tables S1 to S4  
Legend for data S1

#### **Other Supplementary Material for this manuscript includes the following:**

Data S1

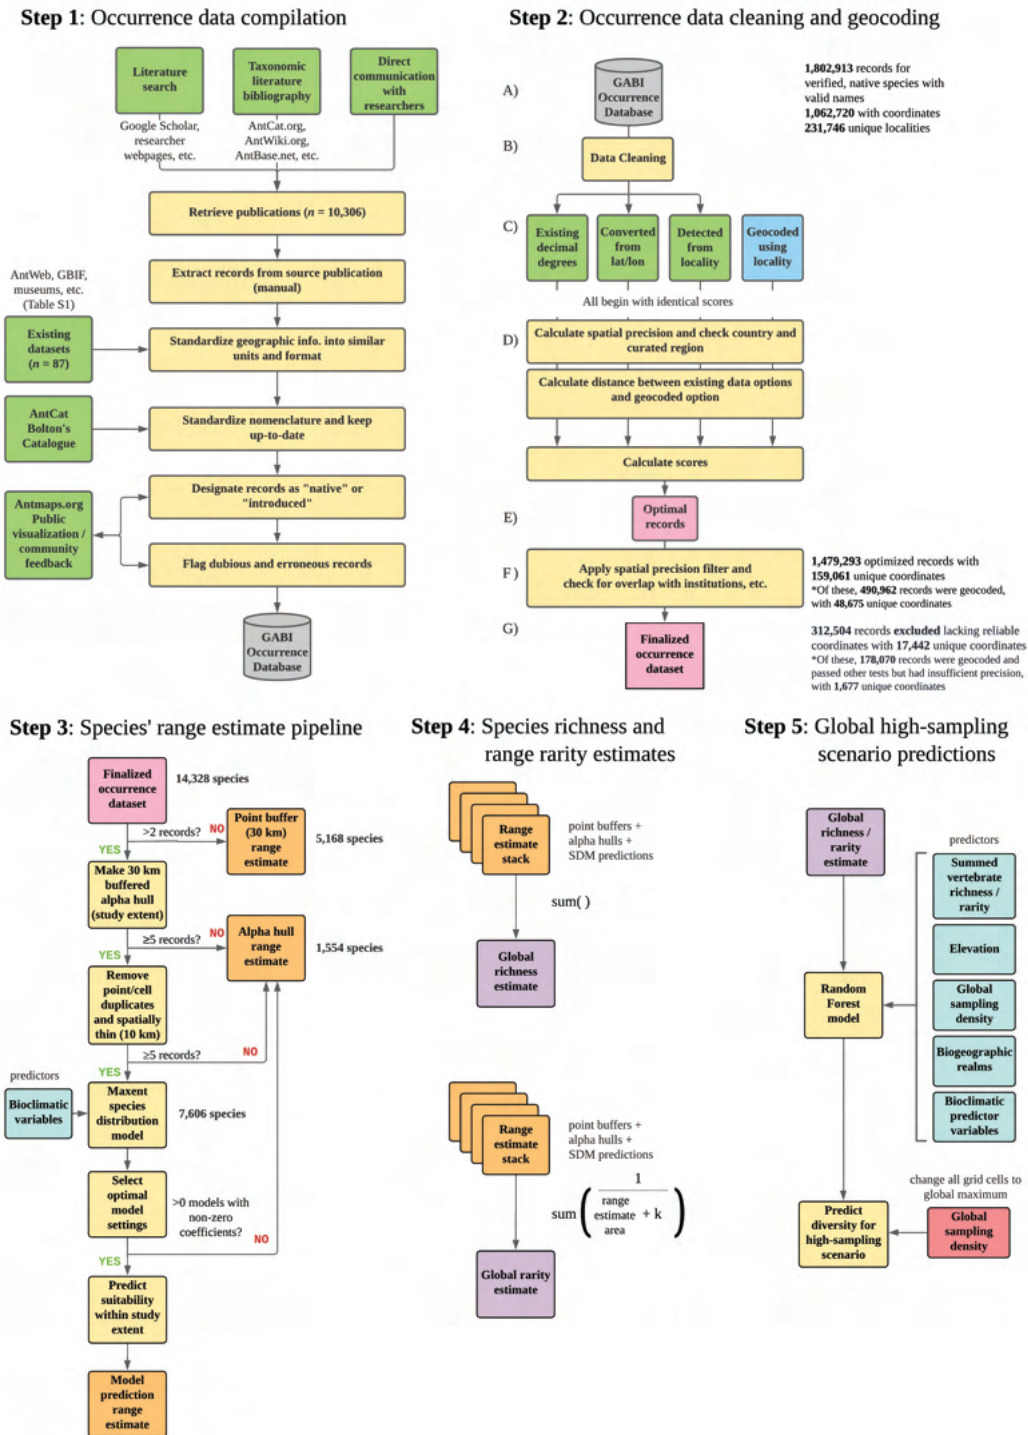

**Fig. S1. Overview of the analysis workflow.** The analyses in this paper involve data compilation, data cleaning and geocoding, estimating ranges, estimating richness and rarity, and predicting under a high-sampling scenario. The first step (data compilation) has been an ongoing effort over many years (see ref. 23) rather than a procedure applied once for this paper, while the others are specifically designed for this study.

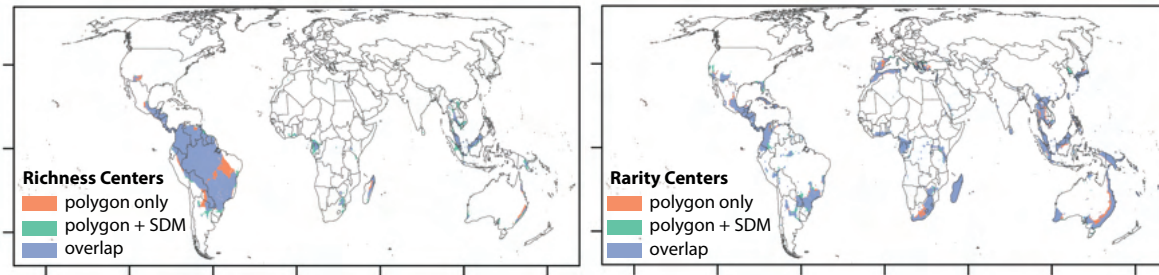

**Fig. S2. Comparing richness and rarity centers inferred with environmental-based SDMs of species ranges versus polygons alone.** Our primary analysis method used buffered points or alpha hull polygons to represent range estimates for all species, but then estimated suitability within these polygons for species with 5 records or greater using species distribution models (SDMs) fit with climatic predictor variables (on the map “polygon + SDM”). This modeling step helped us make more conservative range estimates that assigned areas within their range extent (alpha hull) lower weight outside species’ modeled environmental affinities. However, we determined the extent to which using these models influences the final richness and rarity centers by mapping overlap between the “polygon + SDM” results with richness/rarity centers inferred by stacking univalue polygons assuming the species is found everywhere within its alpha hull (“polygon only” on map), and found mostly marginal effects on the final result.

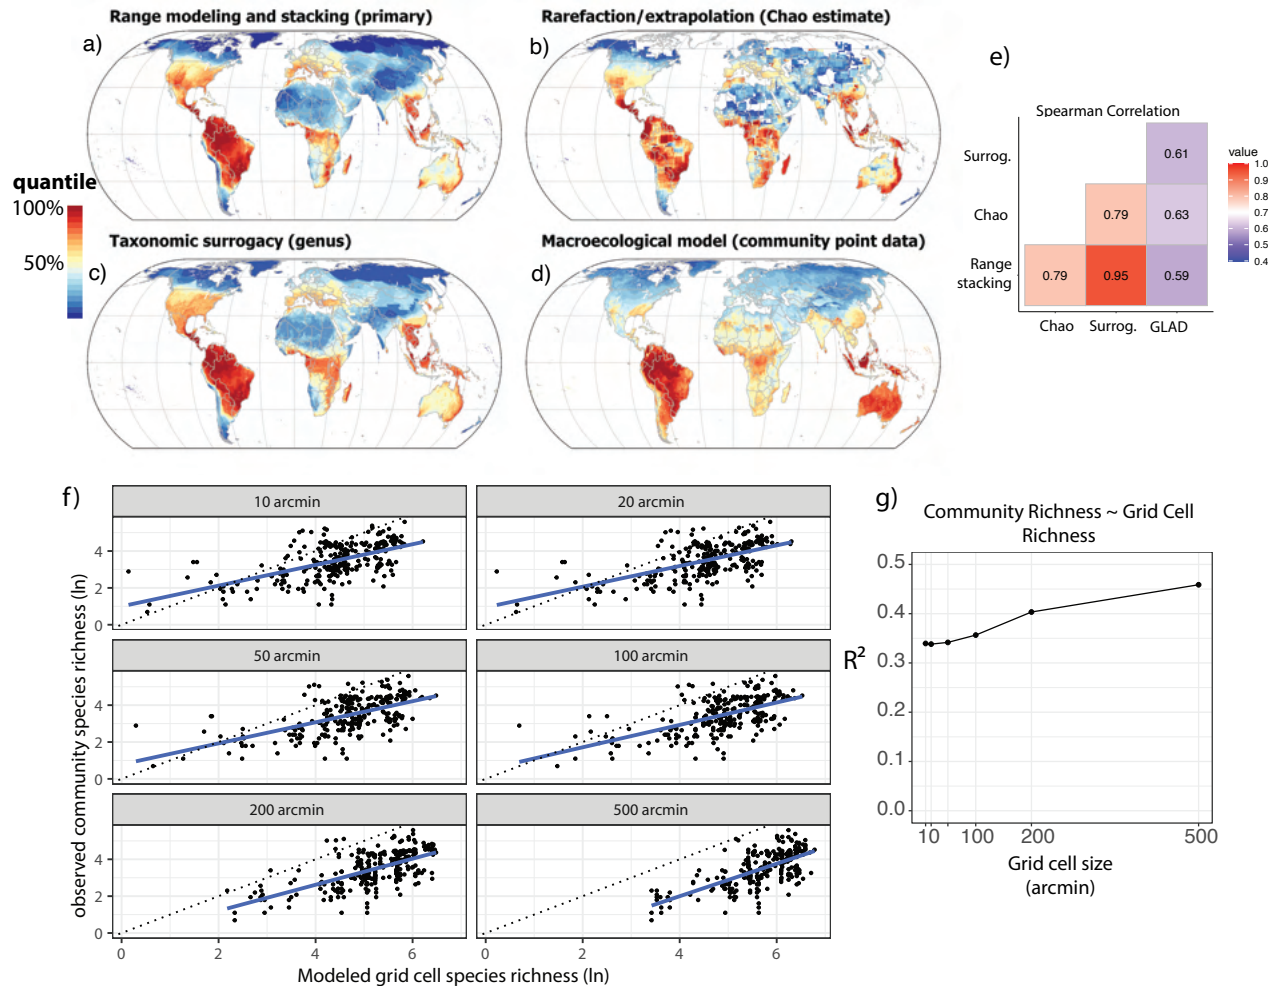

**Fig. S3. Richness estimation methods comparison.** a) Our primary methodology for estimating richness was to estimate the range of each species individually, then stack them together. However, to assess sensitivity to methodological choices, we also estimated richness with three other methods, including b) a rarefaction/extrapolation approach on occurrence data in a moving window, c) a taxonomic surrogacy approach that models the ranges of genera and predicts richness from the empirical species-genus richness correlation, and d) a macroecological model that estimates relationships between macroscale predictor variables and point community richness estimates from the Global Ants Database (GLAD). e) All methods are highly correlated, although the point richness model is less correlated than the others. f) We also compared our grid cell predictions with maximum GLAD point richness measured in each cell. The latter, unlike our global dataset of described species, reflects richness including morphospecies. In general, maximum point observations were lower than the predicted richness for the whole grid cell, which was expected given that a community will rarely contain all species in a region. Likewise, even though the point estimates contain morphospecies, they are rarely higher than modeled values, supporting the notion that our estimates are not exceedingly low even though they do not include undescribed taxa. g) R-squared from the correlation is not strongly influenced by the choice of resolution of the gridding process.

## Species Richness

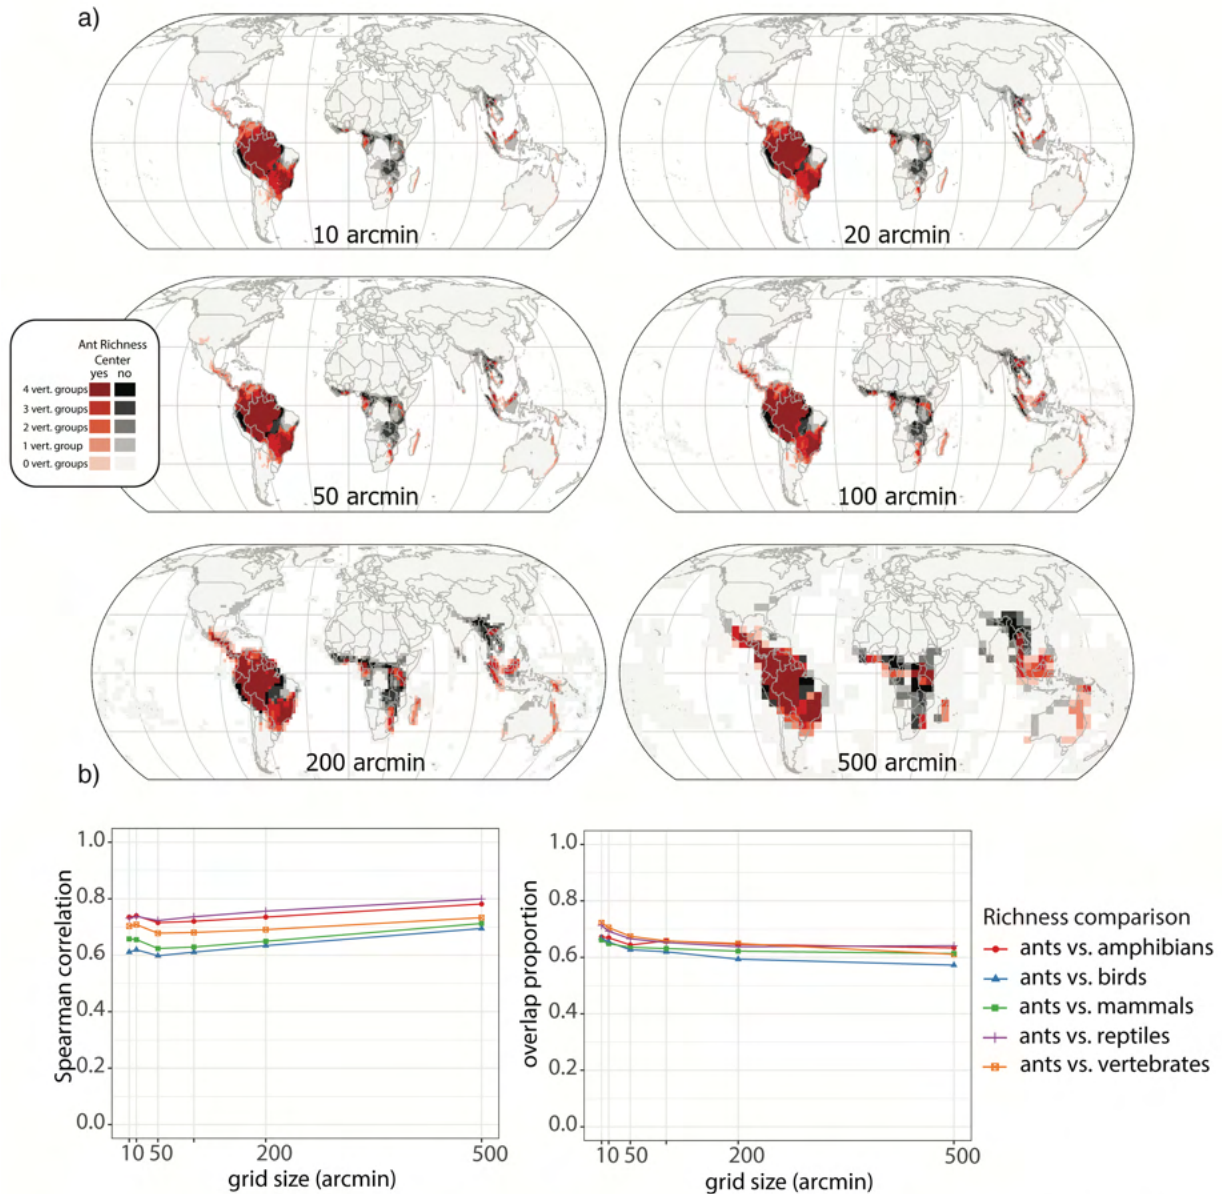

**Fig. S4. Robustness of ant richness centers to analysis scale.** We examined the influence of grid cell size on diversity center distribution and congruence. a) In general, richness center locations were stable until the largest 500 km grid size, at which point centers began to disappear, although the detailed structure of each center naturally depends to some extent on spatial resolution. b) Spearman correlation of richness values and fraction overlap of top 10% areas between ants and other taxa are largely insensitive to the scale of the analysis.

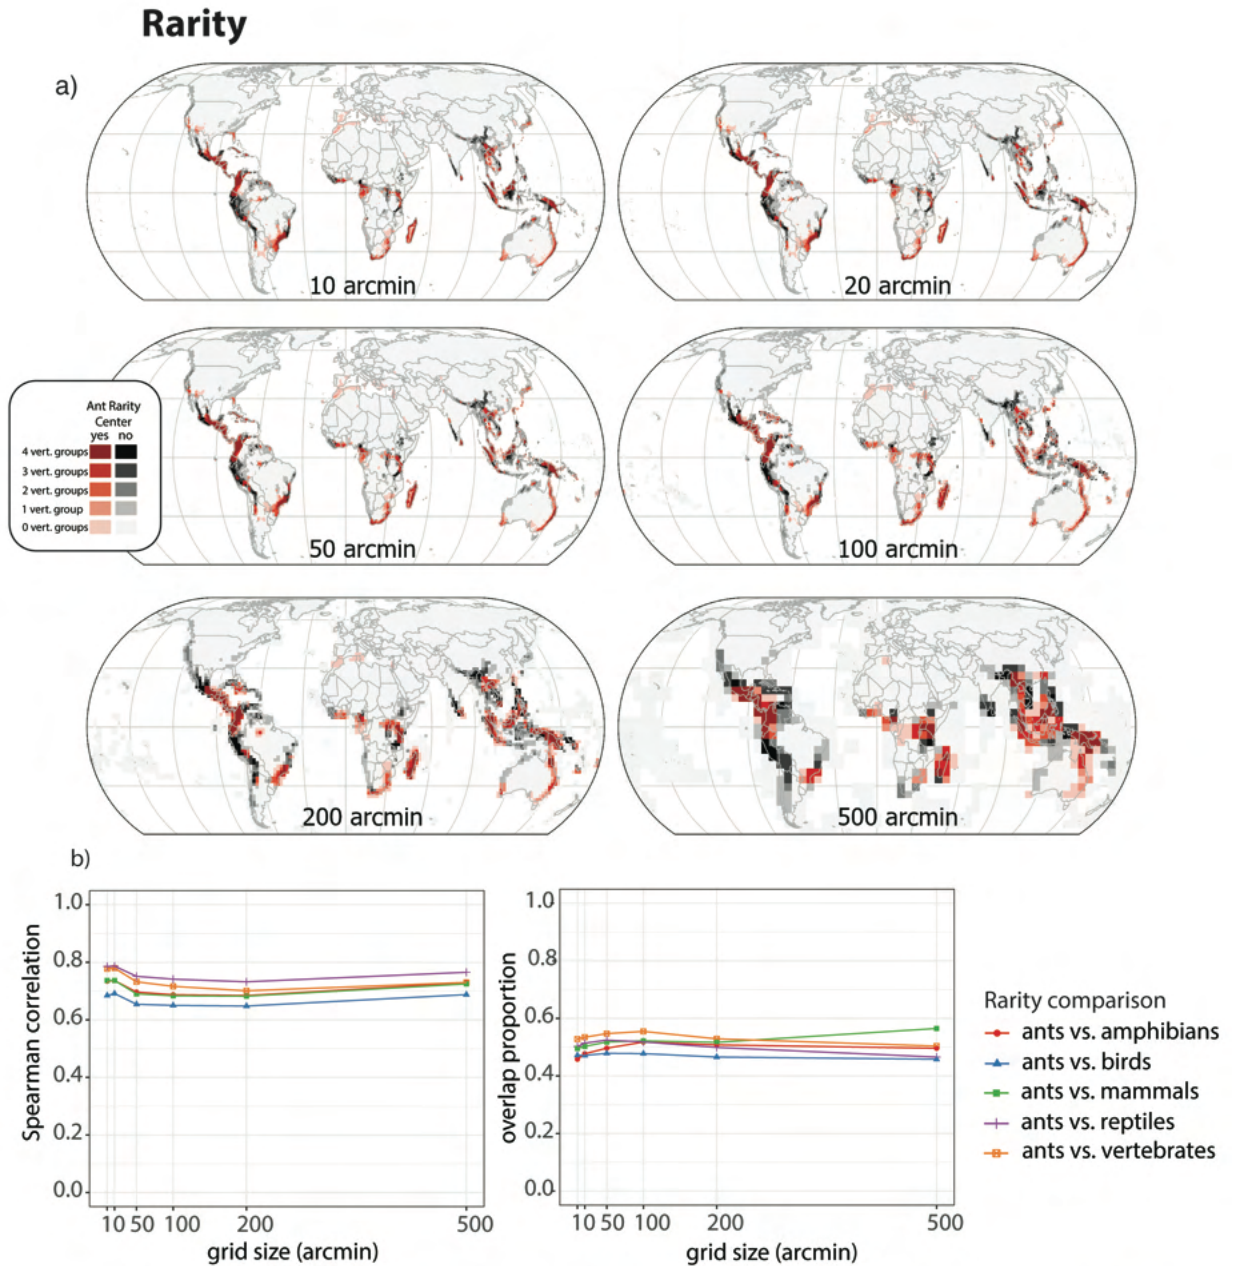

**Fig. S5. Robustness of ant rarity centers to analysis scale.** We examined the influence of grid cell size on rarity center distribution and congruence. a) In general, rarity center locations were stable until the largest 500 km grid size, at which point rarity centers began to disappear, although the detailed structure of each center naturally depends to some extent on spatial resolution. b) Spearman correlation of richness values and fraction overlap of top 10% areas between ants and other taxa are largely insensitive to the scale of the analysis.

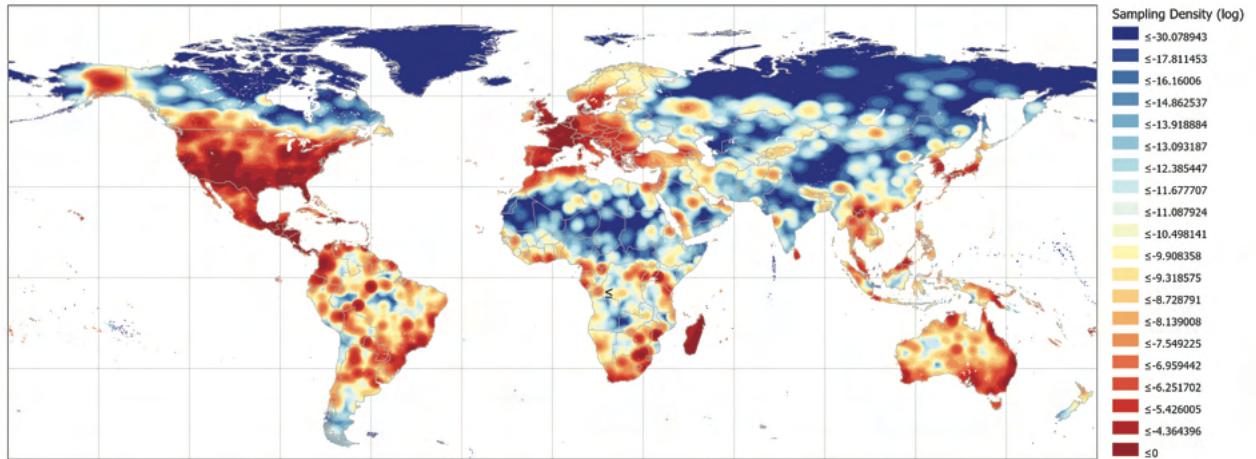

**Fig. S6. Global variation in ant occurrence record density.** Occurrence data density (# of records for described species) was smoothed to create a grid of sampling bias used both to account for bias in the individual species distribution models and as a predictor variable for the Random Forest diversity models.

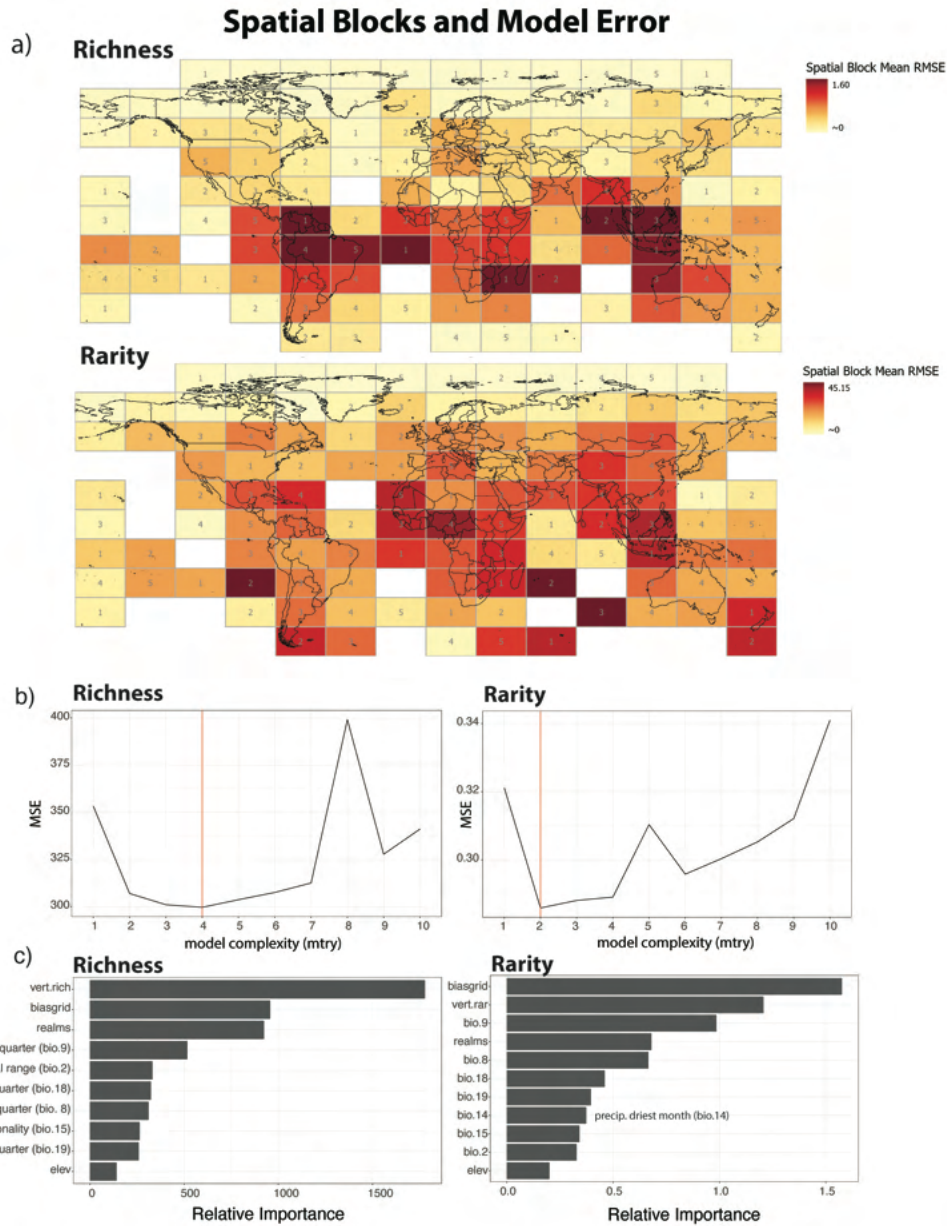

**Fig. S7. Random Forest model cross-validation, tuning, and variable importance.** To evaluate the Random Forest models, we used a spatial cross-validation procedure that separates the globe into systematically defined spatial blocks that delineate training and validation datasets. This evaluation procedure helped us select optimal complexity settings for our models. a) These maps show the spatial fold ( $k = 5$ ) assigned to each block we used for cross-validation and the root mean square error (RMSE) associated with the selected model for each individual block. For example, high RMSE for a block in fold 1 means that the selected model trained on folds 2–5 had high error when predicting richness for the conditions in that block. It is important to state that although the complexity settings for models were chosen via cross-validation, final models were trained on the full dataset—thus, these RMSE values are not reflective of the final models’ performance. b) We fitted models with a range of complexity settings and selected optimal settings with maximum predictive ability (minimum mean square error) for richness and rarity. c) The permuted variable importance scores for the optimized models. These models were then used to predict changes in richness and rarity with universal high sampling around the globe.



**Table S1.**

The number of records and percent of total records originating from different data sources that were compiled for the Global Ant Biodiversity Informatics (GABI) database (downloaded April 17, 2021). Relevant abbreviations for institutions are in parentheses, aggregator database sources are in brackets, and personal datasets are also noted in parentheses with date of access. All data used are available in the supplemental archive (<https://doi.org/10.5061/dryad.wstqjq2pp>).

| <b>Data Source</b>                                                                                          | <b>No. records</b> | <b>% Total Records</b> |
|-------------------------------------------------------------------------------------------------------------|--------------------|------------------------|
| Literature (10,306 Publications)                                                                            | 897509             | 35.86                  |
| AntWeb                                                                                                      | 585075             | 23.38                  |
| Museum of Comparative Zoology (MCZ), Harvard University (entomological collection)                          | 124694             | 4.98                   |
| iDigBio                                                                                                     | 120595             | 4.82                   |
| Mississippi Entomological Museum (MEM)                                                                      | 83862              | 3.35                   |
| INBio Collection [GBIF]                                                                                     | 50644              | 2.02                   |
| Antarea                                                                                                     | 48592              | 1.94                   |
| CSIRO Collection                                                                                            | 45125              | 1.80                   |
| Bees, Wasps and Ants Recording Society                                                                      | 43294              | 1.73                   |
| Field Museum of Natural History (FMNHINS)                                                                   | 33760              | 1.35                   |
| William Mackay Collection (personal dataset; accessed 2016).                                                | 30645              | 1.22                   |
| Formidabel Database                                                                                         | 27234              | 1.09                   |
| Museum of Comparative Zoology, Harvard University [GBIF]                                                    | 26152              | 1.04                   |
| J. T. Longino Collection Database (personal dataset; accessed 2010).                                        | 22501              | 0.899                  |
| IZIKO South Africa Museum Collection                                                                        | 21621              | 0.864                  |
| Dattilo W. et al. 2019. < <a href="https://doi.org/10.1002/ecy.2944">https://doi.org/10.1002/ecy.2944</a> > | 20210              | 0.807                  |
| Centre for Biodiversity Genomics (BiOUG)                                                                    | 19985              | 0.798                  |
| Texas A&M University Insect Collection (ENTO)                                                               | 15661              | 0.626                  |
| Australian Museum provider for Online Zoological Collections of Australian Museums (OZCAM) [GBIF]           | 13132              | 0.525                  |
| AFRC (AfriBugs Collection, Pretoria)                                                                        | 12323              | 0.492                  |
| Zoological Museum, Natural History Museum of Denmark [GBIF]                                                 | 12147              | 0.485                  |
| Instituto de Ciencias Naturales de la Universidad Nacional de Colombia [GBIF]                               | 12086              | 0.483                  |
| Triplehorn Insect Collection (OSUC), Ohio State University [GBIF]                                           | 11570              | 0.462                  |
| iNaturalist (research-grade observations)                                                                   | 11495              | 0.459                  |
| Instituto Nacional de Pesquisas de Amazonia [GBIF]                                                          | 11252              | 0.450                  |
| Texas Tech University – Invertebrate Zoology (TTU-Z)                                                        | 11111              | 0.444                  |
| Field Museum of Natural History [GBIF]                                                                      | 10069              | 0.402                  |
| Archbold Biological Station Arthropod Collection (ARTHARCH)                                                 | 9948               | 0.397                  |
| Royal Belgian Institute of Natural Sciences (from Paraguayan dry Chaco) [GBIF]                              | 8846               | 0.353                  |
| Brigham Young University Arthropod Museum (BYUC)                                                            | 8230               | 0.329                  |
| C.A. Triplehorn Insect Collection, Ohio State University                                                    | 8116               | 0.324                  |
| University of Arizona Insect Collection (UAiC)                                                              | 7740               | 0.309                  |

|                                                                                                                                                                    |      |       |
|--------------------------------------------------------------------------------------------------------------------------------------------------------------------|------|-------|
| Robson Simon Ant Collection (private dataset; accessed 2014)                                                                                                       | 7499 | 0.300 |
| Illinois Natural History Survey [GBIF]                                                                                                                             | 7402 | 0.296 |
| Symbiota Collections of Arthropods Network Project (SCAN)                                                                                                          | 6765 | 0.270 |
| University of Colorado Museum of Natural History Entomology Collection (UCMC)                                                                                      | 6642 | 0.265 |
| Johnson, R. (personal dataset; accessed 2014)<br>< <a href="http://www.asu.edu/clas/sirgtools/resources.htm">http://www.asu.edu/clas/sirgtools/resources.htm</a> > | 5877 | 0.235 |
| BugGuide                                                                                                                                                           | 5322 | 0.213 |
| C.A. Triplehorn Insect Collection, Ohio State University (OSUC)                                                                                                    | 5209 | 0.210 |
| Colorado Plateau Museum of Arthropod Biodiversity (CPMAB)                                                                                                          | 5033 | 0.201 |
| ArtDatabanken Bugs (via GBIF)                                                                                                                                      | 4603 | 0.184 |
| Des Lauriers, J. (personal dataset; accessed 2020)                                                                                                                 | 4584 | 0.183 |
| Lubertazzi, D. Museum of Comparative Zoology (MCZ) at Harvard University (personal dataset)                                                                        | 4430 | 0.177 |
| University of Hawaii Insect Museum (UHiM)                                                                                                                          | 4297 | 0.172 |
| Zoologisches Forschungsinstitut und Museum Alexander Koenig [GBIF]                                                                                                 | 4127 | 0.165 |
| New Mexico State Collection of Arthropods (NMSU)                                                                                                                   | 3997 | 0.160 |
| Museo de Entomología de la Universidad del Valle [GBIF]                                                                                                            | 3929 | 0.157 |
| UAM Entomology Collection (Arctos) [GBIF]                                                                                                                          | 3760 | 0.150 |
| Arizona State University Hasbrouck Insect Collection (ASUHiC)                                                                                                      | 3481 | 0.139 |
| The Sam Noble Museum Department of Recent Invertebrates (RiNVRT)                                                                                                   | 3182 | 0.127 |
| Smithsonian Institution, National Museum of Natural History (entomological collection)                                                                             | 3174 | 0.127 |
| Legakis A. Collection Database, provided by Georgiadis C. (private dataset; accessed 2015)                                                                         | 2365 | 0.094 |
| BioFokus [Artsdatabanken]                                                                                                                                          | 2271 | 0.091 |
| The University of Central Florida Collection of Arthropods (UCFC)                                                                                                  | 2208 | 0.088 |
| Guenard, B. & Liu C., Xishuangbanna Tropical Botanical Garden, Yunnan, China (personal dataset, accessed 2013)                                                     | 2110 | 0.084 |
| University of Guam Insect Collection (ESUG)                                                                                                                        | 1868 | 0.075 |
| Norsk Institutt for Naturforskning [Artsdatabanken]                                                                                                                | 1680 | 0.067 |
| Cleveland Museum of Natural History (CMNHENT) [GBIF]                                                                                                               | 1580 | 0.063 |
| Tinault A. Database [GBIF]                                                                                                                                         | 1416 | 0.057 |
| Norsk Entomologisk Forening [Artsdatabanken]                                                                                                                       | 1353 | 0.054 |
| Museum of Southwestern Biology, Division of Arthropods (MSBA)                                                                                                      | 1212 | 0.048 |
| Canadensys Database                                                                                                                                                | 1185 | 0.047 |
| Donoso D. (personal dataset; accessed 2014)                                                                                                                        | 1153 | 0.046 |
| Insect Biodiversity and Biogeography Laboratory, Hong Kong                                                                                                         | 1033 | 0.041 |
| Mirmecofauna de la reserva ecologica de San Felipe Bacalar [GBIF]                                                                                                  | 818  | 0.033 |
| Essig Museum of Entomology (EMEC)                                                                                                                                  | 716  | 0.029 |
| MUST [Artsdatabanken]                                                                                                                                              | 713  | 0.028 |
| Koch Sheard J. 2020. < <a href="https://doi.org/10.15468/dciinc">https://doi.org/10.15468/dciinc</a> > [GBIF]                                                      | 674  | 0.027 |
| Essig Museum of Entomology – SCAN (PKPC)                                                                                                                           | 456  | 0.018 |
| Escuela Politecnica Nacional, Ecuador                                                                                                                              | 440  | 0.018 |

|                                                                                                                                                                                                                      |     |         |
|----------------------------------------------------------------------------------------------------------------------------------------------------------------------------------------------------------------------|-----|---------|
| United States Geological Survey, Patuxent Wildlife Research Center, Native Bee Inventory and Monitoring Lab                                                                                                          | 439 | 0.018   |
| Prince Edward Island Museum and Heritage Foundation                                                                                                                                                                  | 364 | 0.015   |
| Naturhistorisk Museum – UiO [Artsdatabanken]                                                                                                                                                                         | 344 | 0.014   |
| University of Kansas Natural History Museum Entomology Division (SEMC)                                                                                                                                               | 333 | 0.013   |
| Menke, S.B. Field Museum of Natural History specimen data from                                                                                                                                                       | 320 | 0.013   |
| Catálogo de insectos de la colección del Centro de Entomología – SCAN (CEAM)                                                                                                                                         | 314 | 0.013   |
| The Albert J. Cook Arthropod Research Collection, Michigan State University. <a href="http://www.arc.ent.msu.edu:8080/collection/index.jsp">http://www.arc.ent.msu.edu:8080/collection/index.jsp</a> (accessed 2014) | 289 | 0.012   |
| Colorado Plateau Museum of Arthropod Biodiversity (PiSP)                                                                                                                                                             | 254 | 0.010   |
| University of Alberta Museums, E. H. Strickland Entomological Museum (UASM)                                                                                                                                          | 232 | 0.009   |
| University of California Santa Barbara Invertebrate Zoology Collection (iZC)                                                                                                                                         | 222 | 0.009   |
| The Albert J. Cook Arthropod Research Collection (MSUC)                                                                                                                                                              | 220 | 0.009   |
| Colorado Plateau Museum of Arthropod Biodiversity (CACH)                                                                                                                                                             | 204 | 0.008   |
| University of Delaware Insect Research Collection (UDCC)                                                                                                                                                             | 204 | 0.008   |
| Dugway Proving Ground Natural History Collection (DUG-ENT)                                                                                                                                                           | 134 | 0.005   |
| Tromsø Museum – Universitetsmuseet [Artsdatabanken]                                                                                                                                                                  | 109 | 0.0044  |
| Colorado Plateau Museum of Arthropod Biodiversity (MEVE)                                                                                                                                                             | 106 | 0.0042  |
| Ohio State Acarology Laboratory, Ohio State University (OSAL)                                                                                                                                                        | 102 | 0.0041  |
| Colorado Plateau Museum of Arthropod Biodiversity (CANY)                                                                                                                                                             | 99  | 0.0040  |
| The Davidson College Entomology Collection (DCEC)                                                                                                                                                                    | 80  | 0.0032  |
| NAU Forest Entomology Collection (NAUF5F)                                                                                                                                                                            | 80  | 0.0032  |
| Colorado Plateau Museum of Arthropod Biodiversity (GEWA)                                                                                                                                                             | 65  | 0.0026  |
| C.P. Gillette Museum of Arthropod Diversity (CSUC)                                                                                                                                                                   | 49  | 0.0020  |
| NTNU Vitenskapsmuseet [Artsdatabanken]                                                                                                                                                                               | 44  | 0.0018  |
| GBIF noder utenfor Norge [Artsdatabanken]                                                                                                                                                                            | 43  | 0.0017  |
| Colorado Plateau Museum of Arthropod Biodiversity (GCRA)                                                                                                                                                             | 43  | 0.0017  |
| Colorado Plateau Museum of Arthropod Biodiversity (ZiON)                                                                                                                                                             | 41  | 0.0016  |
| Museum of Northern Arizona – Grand Canyon National Park Collection (GRCA)                                                                                                                                            | 36  | 0.0014  |
| University of Puerto Rico Mayagüez Invertebrate Collection (iNVCOL)                                                                                                                                                  | 32  | 0.0013  |
| Museum of Northern Arizona - Walnut Canyon National Monument Collection (WACA)                                                                                                                                       | 17  | 0.0007  |
| The Broward College Insect Collection (BCiC)                                                                                                                                                                         | 16  | 0.0006  |
| The University of Texas at El Paso Biodiversity Collections, entomology collection (CZUG)                                                                                                                            | 6   | 0.00024 |
| Booher, D. (personal dataset; accessed 2014)                                                                                                                                                                         | 4   | 0.00016 |
| Universitetsmuseet i Bergen (UiB) [Artsdatabanken]                                                                                                                                                                   | 2   | 0.00008 |
| Sarnat, E. (personal dataset; accessed 2015)                                                                                                                                                                         | 2   | 0.00008 |
| Denver Botanic Gardens Collection of Arthropods (DBGA)                                                                                                                                                               | 1   | 0.00004 |
| Hoffmann, B. USDA Honolulu Collection. (personal dataset; accessed 2020)                                                                                                                                             | 1   | 0.00004 |

**Table S2.**

Spearman and Pearson correlation values for richness and rarity based on raster overlays of global richness estimates. Here, “RF” refers to Random Forest model extrapolations under a global high-sampling scenario, and “no vert” refers to the absence of a predictor variable in the RF model for vertebrate richness/rarity. Due to the large number of data points considered, confidence intervals for correlation values were extremely narrow (on the order of  $\pm 0.001$ ) and are not reported here.

| Taxon 1     | Taxon 2         | Spearman richness | Pearson richness | Spearman rarity | Pearson rarity |
|-------------|-----------------|-------------------|------------------|-----------------|----------------|
| ants        | amphibians      | 0.735             | 0.752            | 0.734           | 0.596          |
| ants        | reptiles        | 0.73              | 0.738            | 0.785           | 0.634          |
| ants        | birds           | 0.611             | 0.688            | 0.684           | 0.503          |
| ants        | mammals         | 0.657             | 0.732            | 0.736           | 0.596          |
| ants        | vertebrates     | 0.703             | 0.75             | 0.777           | 0.636          |
| ants        | ants RF         | 0.722             | 0.72             | 0.912           | 0.831          |
| ants        | ants RF no vert | 0.736             | 0.687            | 0.87            | 0.746          |
| amphibians  | reptiles        | 0.742             | 0.821            | 0.758           | 0.622          |
| amphibians  | birds           | 0.839             | 0.836            | 0.839           | 0.66           |
| amphibians  | mammals         | 0.848             | 0.842            | 0.839           | 0.7            |
| amphibians  | ants RF         | 0.695             | 0.685            | 0.784           | 0.708          |
| amphibians  | ants RF no vert | 0.663             | 0.592            | 0.737           | 0.62           |
| reptiles    | birds           | 0.667             | 0.796            | 0.777           | 0.677          |
| reptiles    | mammals         | 0.668             | 0.805            | 0.81            | 0.702          |
| reptiles    | ants RF         | 0.877             | 0.819            | 0.879           | 0.771          |
| reptiles    | ants RF no vert | 0.822             | 0.728            | 0.855           | 0.685          |
| birds       | mammals         | 0.893             | 0.922            | 0.878           | 0.822          |
| birds       | ants RF         | 0.638             | 0.717            | 0.79            | 0.759          |
| birds       | ants RF no vert | 0.549             | 0.592            | 0.745           | 0.695          |
| mammals     | ants RF         | 0.616             | 0.741            | 0.819           | 0.809          |
| mammals     | ants RF no vert | 0.549             | 0.633            | 0.768           | 0.749          |
| vertebrates | ants RF         | 0.726             | 0.778            | 0.877           | 0.857          |
| vertebrates | ants RF no vert | 0.649             | 0.66             | 0.829           | 0.775          |
| ants RF     | ants RF no vert | 0.96              | 0.95             | 0.978           | 0.954          |

**Table S3.**

Quantile values used to define diversity centers (90%) and upper levels of diversity for continuous maps (99%).

| Estimate              | Taxon                                                         | 90%                   | 99%                   |
|-----------------------|---------------------------------------------------------------|-----------------------|-----------------------|
| Species richness      | Ant                                                           | 111.139               | 230.549               |
|                       | Amphibian                                                     | 37                    | 93                    |
|                       | Reptile                                                       | 107                   | 167                   |
|                       | Bird                                                          | 338                   | 504                   |
|                       | Mammal                                                        | 125                   | 179                   |
|                       | Vertebrate                                                    | 601                   | 917                   |
|                       | Chao estimator                                                | 560.707               | 947.654               |
|                       | Genus surrogate                                               | 134.724               | 254.562               |
|                       | Macroecological model                                         | 75.143                | 140.879               |
|                       | Macroecological model, clamped                                | 74.894                | 140.339               |
|                       | Random Forest extrapolation                                   | 241.808               | 315.602               |
|                       | Random Forest extrapolation, no vertebrate richness predictor | 227.518               | 332.305               |
| Range rarity richness | Ant                                                           | $1.14 \times 10^{-4}$ | $4.46 \times 10^{-4}$ |
|                       | Amphibian                                                     | $3.67 \times 10^{-5}$ | $1.50 \times 10^{-4}$ |
|                       | Reptile                                                       | $8.10 \times 10^{-5}$ | $2.25 \times 10^{-4}$ |
|                       | Bird                                                          | $1.36 \times 10^{-4}$ | $4.18 \times 10^{-4}$ |

|  |                                                               |                       |                       |
|--|---------------------------------------------------------------|-----------------------|-----------------------|
|  | Mammal                                                        | $5.99 \times 10^{-5}$ | $1.56 \times 10^{-4}$ |
|  | Vertebrate                                                    | $3.09 \times 10^{-4}$ | $8.81 \times 10^{-4}$ |
|  | Random Forest extrapolation                                   | $2.28 \times 10^{-4}$ | $6.04 \times 10^{-4}$ |
|  | Random Forest extrapolation, no vertebrate richness predictor | $3.17 \times 10^{-4}$ | $7.42 \times 10^{-4}$ |

**Table S4.**

Overlap values for richness and rarity based on rasters of diversity centers for global richness estimates. Here, “RF” refers to Random Forest model extrapolations under a global high-sampling scenario, and “no vert” refers to the absence of a predictor variable in the RF model for vertebrate richness/rarity.

| Taxon 1     | Taxon 2         | Overlap richness | Overlap rarity |
|-------------|-----------------|------------------|----------------|
| ants        | amphibians      | 0.672            | 0.458          |
| ants        | reptiles        | 0.713            | 0.502          |
| ants        | birds           | 0.669            | 0.472          |
| ants        | mammals         | 0.661            | 0.496          |
| ants        | vertebrates     | 0.722            | 0.528          |
| ants        | ants RF         | 0.538            | 0.661          |
| ants        | ants RF no vert | 0.434            | 0.557          |
| amphibians  | reptiles        | 0.72             | 0.467          |
| amphibians  | birds           | 0.744            | 0.598          |
| amphibians  | mammals         | 0.689            | 0.609          |
| amphibians  | ants RF         | 0.432            | 0.6            |
| amphibians  | ants RF no vert | 0.352            | 0.5            |
| reptiles    | birds           | 0.688            | 0.565          |
| reptiles    | mammals         | 0.671            | 0.564          |
| reptiles    | ants RF         | 0.542            | 0.596          |
| reptiles    | ants RF no vert | 0.434            | 0.476          |
| birds       | mammals         | 0.742            | 0.742          |
| birds       | ants RF         | 0.438            | 0.726          |
| birds       | ants RF no vert | 0.345            | 0.589          |
| mammals     | ants RF         | 0.487            | 0.684          |
| mammals     | ants RF no vert | 0.406            | 0.586          |
| vertebrates | ants RF         | 0.465            | 0.786          |
| vertebrates | ants RF no vert | 0.384            | 0.62           |
| ants RF     | ants RF no vert | 0.736            | 0.763          |

**Data S1. (separate files)**

The supplemental data package containing all data, analysis code, and results is available in a Dryad archive (<https://doi.org/10.5061/dryad.wstjq2pp>).
